# Supplementary material for: Accurate determination of arsenic and selenium in plant food samples by using ICP-MS/MS
Source: Royal Society of Chemistry journal article supplement (doi:10.1039/c6ay01414c), 2016-01-01
Supplement: c6ay01414c1.pdf [file c6ay01414c1.pdf]

### Supporting information

Table S1 As and Se concentrations determined by using four modes

| Cell condition | <sup>75</sup> As | <sup>77</sup> Se | <sup>78</sup> Se | <sup>80</sup> Se | <sup>82</sup> Se |
|----------------|------------------|------------------|------------------|------------------|------------------|
| No gas         | 14.9±0.1         | 179.7±0.7        | 51.6±0.1         | -                | 111.7±1.9        |
| He             | 31.1±0.7         | 1896.7±104.3     | 315.0±15.1       | 133.8±11.6       | 1037.5±69.3      |
| H <sub>2</sub> | 34.4±0.1         | 82.8±3.0         | 6.1±0.2          | 3.9±0.0          | 41.0±1.1         |
| O <sub>2</sub> | 1.1±0.1          | 1.4±0.2          | 0.9±0.0          | 0.9±0.0          | 1.0±0.1          |

A solution containing 100 mg·L<sup>-1</sup> Ca and K, 1 mg·L<sup>-1</sup> REEs as well as 1 µg·L<sup>-1</sup> As and Se was applied.

Table S2 Salt matrix (K and Ca) and REEs (Nd, Sm, Eu, Gd, Dy, Tb, Er and Ho) contents in the standard reference materials

|               | Ca<br>(10 <sup>-2</sup> ) | K<br>(10 <sup>-2</sup> ) | Nd<br>(10 <sup>-6</sup> ) | Sm<br>(10 <sup>-9</sup> ) | Eu<br>(10 <sup>-9</sup> ) | Gd<br>(10 <sup>-9</sup> ) | Dy<br>(10 <sup>-9</sup> ) | Tb<br>(10 <sup>-9</sup> ) | Er<br>(10 <sup>-9</sup> ) | Ho<br>(10 <sup>-9</sup> ) |
|---------------|---------------------------|--------------------------|---------------------------|---------------------------|---------------------------|---------------------------|---------------------------|---------------------------|---------------------------|---------------------------|
| Rice          | 67.3±8.7                  | 0.106±0.007              |                           |                           |                           |                           |                           |                           |                           |                           |
| Wheat         | 0.034±0.002               | 0.140±0.006              | 0.0046±0.0014             | 0.96±0.28                 | ~0.8                      | ~0.91                     | ~0.8                      | ~0.10                     | ~0.31                     | ~0.12                     |
| Spinach       | 0.66±0.03                 | 2.49±0.11                | 0.28±0.03                 | 56±5                      | 11.1±1.<br>4              | 54±7                      | 41±8                      | 7.2±0.7                   | 17±3                      | 8.7±1.7                   |
| Citrus leaves | 4.2±0.4                   | 0.77±0.04                | 0.42±0.05                 | 80±7                      | ~33                       | 81±10                     | 57±5                      | 11±1                      | 26±6                      | 11±1                      |
| Celery        | 1.66±0.06                 | 2.7±0.                   | 0.47±0.08                 | 87±9                      | 20±2                      | 81±13                     | 64±1<br>1                 | 12.6±2.6                  | 30±4                      | 12.4±1.3                  |

Table S3 Comparison of As and Se content between determined by using “no gas” mode, O<sub>2</sub> mass-shift mode and certified values after 1ppm REEs were added into sample solutions

|               | Cell condition | As                                      |                                        | Se                                      |                                         |                                         |                                         | Certified value (mg·kg <sup>-1</sup> ) |
|---------------|----------------|-----------------------------------------|----------------------------------------|-----------------------------------------|-----------------------------------------|-----------------------------------------|-----------------------------------------|----------------------------------------|
|               |                | <sup>75</sup> As (mg·kg <sup>-1</sup> ) | Certified value (mg·kg <sup>-1</sup> ) | <sup>77</sup> Se (mg·kg <sup>-1</sup> ) | <sup>78</sup> Se (mg·kg <sup>-1</sup> ) | <sup>80</sup> Se (mg·kg <sup>-1</sup> ) | <sup>82</sup> Se (mg·kg <sup>-1</sup> ) |                                        |
| Rice          | no gas         | 2.872±0.362                             | 0.110±0.020                            | 43.825±5.078                            | 11.229±1.551                            | -                                       | 29.277±3.395                            | 0.045±0.015                            |
|               | O <sub>2</sub> | 0.098±0.002                             |                                        | 0.137±0.020                             | 0.046±0.003                             | 0.042±0.001                             | 0.051±0.007                             |                                        |
| Wheat         | no gas         | 2.760±0.319                             | 0.031±0.005                            | 43.976±2.256                            | 10.831±1.490                            | -                                       | 29.276±3.298                            | 0.053±0.007                            |
|               | O <sub>2</sub> | 0.029±0.001                             |                                        | 0.147±0.017                             | 0.053±0.001                             | 0.053±0.004                             | 0.060±0.005                             |                                        |
| Spinach       | no gas         | 2.891±0.118                             | 0.230±0.030                            | 44.243±1.770                            | 78.651±15.004                           | -                                       | 31.018±1.726                            | 0.092±0.024                            |
|               | O <sub>2</sub> | 0.260±0.003                             |                                        | 0.179±0.018                             | 0.069±0.003                             | 0.067±0.003                             | 0.088±0.006                             |                                        |
| Citrus leaves | no gas         | 3.796±0.150                             | 1.100±0.200                            | 42.544±1.466                            | 22.427±1.481                            | -                                       | 28.839±8.48                             | 0.170±0.080                            |
|               | O <sub>2</sub> | 1.147±0.012                             |                                        | 0.267±0.021                             | 0.162±0.001                             | 0.161±0.004                             | 0.172±0.008                             |                                        |
| Celery        | no gas         | 2.837±0.168                             | 0.390±0.080                            | 40.755±2.753                            | 21.615±10.498                           | -                                       | 27.788±1.983                            | 0.118±0.017                            |
|               | O <sub>2</sub> | 0.374±0.008                             |                                        | 0.174±0.019                             | 0.104±0.008                             | 0.102±0.003                             | 0.120±0.014                             |                                        |
